# Supplementary material for: Clinicobiological Characteristics and Outcomes of Patients with T-Cell Large Granular Lymphocytic Leukemia and Chronic Lymphoproliferative Disorder of Natural Killer Cells from a Single Institution
Source: MDPI journal article supplement (doi:10.3390/cancers13153900), 2021-08-02
Supplement: s1 [file s1]

# Supplementary material: Clinicobiological Characteristics and Outcomes of Patients with T-Cell Large Granular Lymphocytic Leukemia and Chronic Lymphoproliferative Disorder of Natural Killer Cells from a Single Institution

Andrea Rivero, Pablo Mozas, Laura Jiménez, Mónica López-Guerra, Dolors Colomer, Alex Bataller, Juan Correa, Alfredo Rivas-Delgado, Gabriela Bastidas, Tycho Baumann, Alejandra Martínez-Trillos, Julio Delgado, Eva Giné, Elías Campo, Armando López-Guillermo, Neus Villamor, Laura Magnano and Estella Matutes

**Table S1.** List of antibodies employed in the diagnosis of T-cell large granular lymphocytic leukemia and chronic lymphoproliferative disorder of NK cells.

| Cell Type     | Antibody                                                                    |
|---------------|-----------------------------------------------------------------------------|
| B lymphocytes | CD19                                                                        |
| T lymphocytes | CD3, CD4, CD8, CD2, CD5, CD7, TCR $\alpha\beta$ , TCR $\gamma\delta$ , CD57 |
| NK Cells      | CD56, CD16                                                                  |
